# Supplementary material for: Ghosts of infections past: using archival samples to understand a century of monkeypox virus prevalence among host communities across space and time
Source: PubMed Central journal article supplement (PMC5792900; doi:10.1098/rsos.171089), 2018-01-31

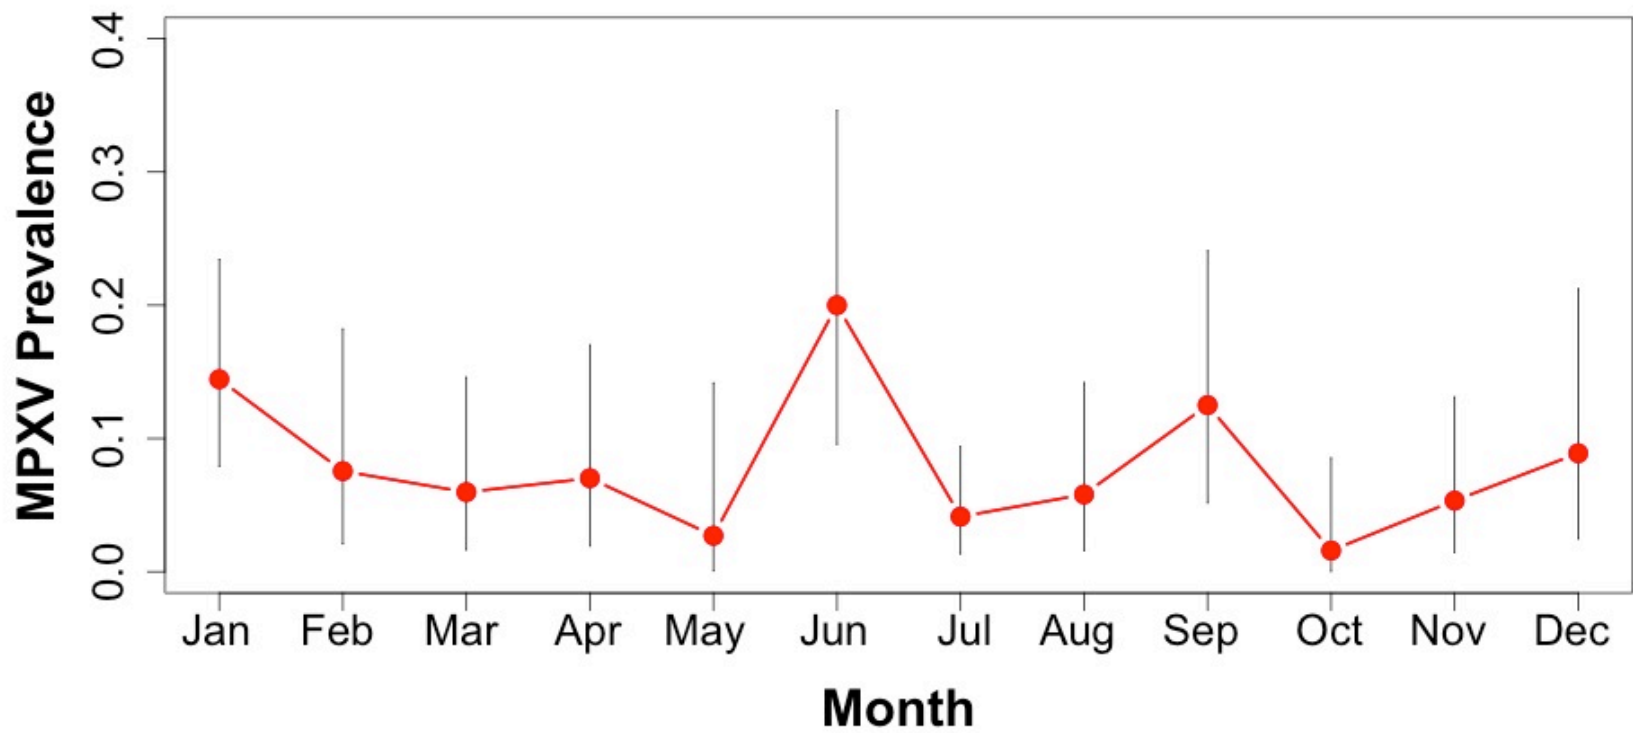

Supplement: rsos171089supp3.pdf [file rsos171089supp3.pdf]
