# Supplementary material for: Ghosts of infections past: using archival samples to understand a century of monkeypox virus prevalence among host communities across space and time
Source: PubMed Central journal article supplement (PMC5792900; doi:10.1098/rsos.171089), 2018-01-31
Supplement: rsos171089supp5.pdf [file rsos171089supp5.pdf]

| COUNTRY OF ORIGIN                  | Number of <i>Funisciurus</i> Samples Screened for MPX Viral DNA |               |                    |                 |                 |                    |               |                   |                 |                    |                     |             |
|------------------------------------|-----------------------------------------------------------------|---------------|--------------------|-----------------|-----------------|--------------------|---------------|-------------------|-----------------|--------------------|---------------------|-------------|
|                                    | <i>anerythrus</i>                                               | <i>bayoni</i> | <i>carruthersi</i> | <i>congicus</i> | <i>isabella</i> | <i>lemniscatus</i> | <i>leonis</i> | <i>leucogenys</i> | <i>pyrropus</i> | <i>substriatus</i> | Unknown <i>spp.</i> | All species |
| Angola                             | ---                                                             | ---           | ---                | 92              | ---             | ---                | ---           | ---               | ---             | ---                | ---                 | 92          |
| Burundi                            | ---                                                             | ---           | 3                  | ---             | ---             | ---                | ---           | ---               | ---             | ---                | ---                 | 3           |
| Cameroon                           | 1                                                               | ---           | ---                | ---             | 6               | 14                 | ---           | ---               | 1               | 4                  | ---                 | 26          |
| Central African Rep.               | 5                                                               | ---           | ---                | ---             | ---             | 1                  | ---           | ---               | 1               | 1                  | ---                 | 8           |
| Congo, Republic of                 | 14                                                              | ---           | ---                | 5               | 10              | 25                 | ---           | ---               | 14              | 1                  | ---                 | 69          |
| Democratic Republic of Congo (DRC) | 331                                                             | 7             | 92                 | 128             | ---             | 29                 | ---           | ---               | 159             | 1                  | ---                 | 747         |
| Equatorial Guinea                  | ---                                                             | ---           | ---                | ---             | ---             | ---                | ---           | 2                 | ---             | ---                | ---                 | 2           |
| Gabon                              | ---                                                             | ---           | ---                | ---             | 1               | 9                  | ---           | ---               | 5               | ---                | ---                 | 15          |
| Ghana                              | ---                                                             | ---           | ---                | ---             | ---             | ---                | ---           | ---               | 2               | ---                | 1                   | 3           |
| Cote d'Ivoire                      | ---                                                             | ---           | ---                | ---             | ---             | ---                | ---           | 4                 | 9               | ---                | ---                 | 13          |
| Liberia                            | ---                                                             | ---           | ---                | ---             | ---             | ---                | 2             | ---               | ---             | ---                | ---                 | 2           |
| Rwanda                             | ---                                                             | ---           | 13                 | ---             | ---             | ---                | ---           | ---               | ---             | ---                | ---                 | 13          |
| Uganda                             | ---                                                             | ---           | 1                  | ---             | ---             | ---                | ---           | ---               | ---             | ---                | ---                 | 1           |
| Unknown                            | 11                                                              | ---           | ---                | 14              | 1               | 4                  | ---           | ---               | 10              | 4                  | ---                 | 44          |
| <b>TOTAL</b>                       | <b>362</b>                                                      | <b>7</b>      | <b>109</b>         | <b>239</b>      | <b>18</b>       | <b>82</b>          | <b>2</b>      | <b>6</b>          | <b>201</b>      | <b>11</b>          | <b>1</b>            | <b>1038</b> |
