# Supplementary material for: Ghosts of infections past: using archival samples to understand a century of monkeypox virus prevalence among host communities across space and time
Source: PubMed Central journal article supplement (PMC5792900; doi:10.1098/rsos.171089), 2018-01-31
Supplement: rsos171089supp6.pdf [file rsos171089supp6.pdf]

| variable            | $LR \chi^2$ | <i>d.f.</i> | <i>p</i> -value |
|---------------------|-------------|-------------|-----------------|
| museum              | 36.70       | 1           | 1.38E-9         |
| species             | 14.77       | 4           | 0.0052          |
| month of collection | 19.17       | 11          | 0.058           |
| collection period   | 21.59       | 14          | 0.088           |
| sex                 | 1.69        | 1           | 0.19            |
| age of specimen     | 0.938       | 11          | 0.33            |
